# Supplementary material
Source: publisher figshare collection journal article supplement (https://tandf.figshare.com/ndownloader/files/38860090)
Supplement: Supplementary file 1 [file 38860090]

Table S1. Measures mapped to self-regulation aspect and corresponding study

| Measure of self-regulation | Aspect of self-regulation measured | Study |
| --- | --- | --- |
| **Teacher report measures** | | |
| Achenbach System of Empirically Based Assessment (ASEBA) Teacher Report Form (TRF; Achenbach & Rescorla, 2001) | Externalizing or internalizing disorders | Lavoie et al. (2017) |
| Adaptation of Individualized Classroom Assessment Scoring System (inCLASS; Downer et al., 2010) | Global behaviors reflective of student engagement | Garrett-Peters et al. (2019) |
| Adaptive Social Behavioral Inventory (ASBI; Hogan et al., 1992) | Social behavior and emotional  adjustment | Talaee (2019) |
| ADHD Rating Scale (DuPaul et al., 1997) | Classroom attention | Sasser et al. (2015) |
| ADHD rating scale-IV (DuPaul et al., 1998) | ADHD-related symptoms | Papaioannou et al. (2016) |
| Attention Deficit Hyperactivity Disorder Rating Scale (ADHDRS; DuPaul et al., 1998) | Behaviors in the classroom over the past 6 months | Garrett-Peters et al. (2019) |
| Behavior Problems Index (Peterson & Zill, 1986) | Social-emotional development | Aikens et al. (2017) |
| Behavior Rating Inventory of Executive Function -Preschool Version (BRIEF-P; Gioia et al., 1996) | EF (emotional, behavioral, and functional manifestations) | Bernier et al., (2015)  O'Meagher et al. (2017)  Lonigan et al. (2017) |
| Behavioral Assessment System for Children, Second Edition (BASC-2; Kamphaus, 2014) | Externalizing problems | Graves Jr et al. (2017) |
| BRIEF or BRIEF 2 (Gioia et al., 2015) |  | Li-Grining et al. (2019) |
| Child Behavior Checklist (Achenbach, 1991) | Behavior problems | Li-Grining et al. (2019) |
| Child behavior checklist (CBCL) (Achenbach, 1991) | Problem behaviors and self-regulation | Firoozi & Rouhi (2020)  Dan (2016) |
| Child Behavior Rating Scale (Bronson et al., 1990) | Learning-related and problem behaviors | Brock et al. (2018) |
| Child Behavior Rating Scale (CBRS; Bronson et al., 1990) | Self-regulation | Duran and Grissmer (2020) |
| Child Social Behavioral Questionnaire (CSBQ; Sylva et al., 2008) | Social and emotional behavior, hyperactivity and settling-into-school | Talaee (2019) |
| Classroom engagement (student work orientation, compliance, and persistence in the classroom: works cooperatively with other children, follows directions, follows rules, follows instructions, completes work on time, works independently, listens attentively, works neatly and carefully, puts a lot of effort into work, participates in class, and ask questions when he/she does not understand) | Self-regulation in terms of its cognitive, emotional, and behavioral dimensions through a measure of classroom engagement | Piche et al. (2015) |
| Classroom Participation school readiness inventory (Sasser et al., 2015) | School readiness (self-regulation, learning motivation and conscientiousness) | Sasser et al. (2015) |
| Conners Early Childhood (Harbarth et al., 2017) | Behavioral and emotional problems | Bergold et al. (2019) |
| Cooper-Farran behavioral rating scale (CFBRS; Cooper & Farran, 1991) | Informant-report self-regulation | Baron et al. (2020) |
| Devereux Student Strengths Assessment DESSA (Doromal et al., 2019; LeBuffe et al., 2009/2014) | Social-emotional competence | Shapiro et al. (2017)  Duran & Grissmer (2020) |
| Devereux Student Strengths Assessment Mini (DESSA-Mini; Naglieri et al., 2011/2014) | Social-emotional competence | Shapiro et al. (2017) |
| DuPaul Attention Deficit Hyperactivity Disorder Rating Scale (DuPaul et al., 1998) | Emotion regulation | Ozyurt et al. (2017) |
| ECLS-K Approaches to Learning scale (U.S. Department of Education, 2002) | Approaches to learning -paying attention well, persisting in completing tasks | Aikens et al. (2017) |
| Emotion Regulation Checklist (ERC; Shields & Cicchetti, 1997) | Emotion regulation | Ozyurt et al. (2017) |
| Emotion Regulation Scale (Shields & Cicchetti, 1997) | Emotional responsiveness of children and the expression and regulation of the emotions within the environment children experience | Ersan & Tok (2020) |
| Emotional Competence Questionnaire (Collaborative for Academic Social and Emotional Learning and American Institutes for Research, 2013) | Self-awareness, self-management, social awareness, relationship, skills and responsible decision-making | Carroll et al. (2020a) |
| EYT Child Self-Regulation and Behavior Questionnaire (CSBQ; Howard & Melhuish, 2017) | Self-regulation and social development | Howard & Melhuish (2017) |
| Kindergarten Academic and Behavior Readiness Screener (K-ABRS; Stormont et al., 2011) | Student academic, behavioral, and overall readiness for kindergarten | Stormont et al. (2019) |
| Learning Behaviors Scale (LBS; (McDermott, 1999) | Student engagement-learning behaviors | Garrett-Peters et al. (2019) |
| Modified SSRS (Gottfried, 2014) | Problem behaviors and social skills | Gottfried & Le (2016) |
| Personal Maturity Scale (Entwistle et al., 1997) | Social-emotional development | Aikens et al. (2017) |
| Preschool and Kindergarten Behavior Scales- Second Edition (PKBS-2; Merrell, 2002) | Social skills and problem behaviors | Major et al. (2018) |
| Preschool Social Behavior Scale-Teacher Form (Crick et al., 1997) | Children‘s social behaviors | Ersan & Tok, (2020) |
| Self-regulation assessor rating (SAR; Smith-Donald et al., 2007) | Informant-report self-regulation | Baron et al. (2020) |
| Self-regulation scaled adapted from the Barratt Impulsiveness Scale Version 11 (BIS-11; Patton et al., 1995) | Self-regulation- attention, activity, planning, working memory and inhibitory control | Li-Grining et al. (2019) |
| Social and Emotional Competence Change Index (SECCI; Evidence-based Prevention and Intervention Supports Centre, 2014) (Kusche & Greenberg, 1994) | Social–emotional competence | Humphrey et al. (2016) |
| Social Behaviors Questionnaire (Tremblay et al., 1991) | Self-regulation | Piche et al. (2015) |
| Social Competence Scale (Conduct Problems Prevention Research Group, 1995) | Social competence | Sasser et al., (2015)  Fishbein et al. (2016) |
| Social Competence Scale Teacher version (T-COMP; Conduct Problems Prevention Research Group, 1995) | Student prosocial behavior | Stormont et al. (2019) |
| Social- Emotional Assets and Resiliency Scales (SEARS; Merrell et al., 2011) | Social emotional, knowledge, peer acceptance and relationships, resilience in the face of difficulties, coping skills, problem-solving abilities, empathy, global self-concept, and other positive traits | Graves Jr et al. (2017) |
| Social Skills Improvement System rating scale (SSIS; Gresham & Elliott, 2008) | Learning-related and problem behaviors | Brock et al., (2018)  Humphrey et al. (2016)  Duran & Grissmer (2020) |
| Social Skills Rating System (Gresham & Elliott, 2008) | Social-emotional development | Aikens et al. (2017) |
| Strengths and Difficulties Questionnaire (SDQ; Goodman, 1997) | Self-regulation, hyperactivity, pro-social and anti-social behavior | Talaee (2019)  Halldorsdottir et al. (2019)  Sang et al. (2018)  Garrett-Peters et al. (2019)  Carroll et al. (2020a)  Carroll et al. (2020b)  Sloan et al. (2020)  Lavoie et al. (2017)  Humphrey et al. (2016)  Chanfreau et al. (2016)  Bergold et al. (2019) |
| Strengths and weaknesses of ADHD-symptoms and Normal-Behaviors Rating Scale (SWAN; Swanson et al., 2012) | Behavioral characteristics representative of attention skills | Allan et al. (2015)  Lonigan et al. (2017) |
| Student’s Achievement-Relevant Actions in the Classroom: Engagement Versus Disaffection with Learning (SARAC; Skinner et al., 2009; Wellborn, 1992) | Students’ engagement with learning: behavioral engagement, emotional engagement, behavioral disaffection, and emotional disaffection | Garrett-Peters et al. (2019) |
| Survey of Early School Adjustment Difficulty (Rimm-Kaufman, 2005) | Difficulties transitioning to kindergarten | Duran & Grissmer (2020) |
| Teacher Observation of Child Adaptation Revised (TOCA-R; Werthamer-Larsson et al., 1991) | Child aggression | Sasser et al., (2015)  Fishbein et al. (2016)  Gatzke-Kopp et al. (2015) |
| The Boxall Profile (Bennethan & Boxall, 1998) | Child development | Lavoie et al. (2017) |
| TOCA-C (Koth et al., 2009; Werthamer-Larsson et al., 1991) | Classroom behavior | Stormont et al. (2019)  O'Brennan et al. (2015) |
| Verhaltensbeurteilungsbogen für Vorschulkinder  3–6 (VBV; Questionnaire for Assessing Preschool Children’s Behavior 3–6; (Döpfner et al., 1993) | Behavioral and emotional problems, social emotional, skills | Bergold et al. (2019) |
| **Caregiver report measures** | | |
| Conners Early Childhood (Harbarth et al., 2017) | Behavioral and emotional problems | Bergold et al. (2019) |
| Verhaltensbeurteilungsbogen für Vorschulkinder  3–6 (VBV; Questionnaire for Assessing Preschool Children’s Behavior 3–6; (Döpfner et al., 1993) | Behavioral and emotional problems, social emotional, skills | Bergold et al. (2019) |
| Preschool and Kindergarten Behavior Scales- Second Edition (PKBS-2; Merrell, 2002) | Social skills and problem behaviors | Major et al. (2018) |
| Firoozi and Rouhi (2020) | Problem behaviors |  |
| BRIEF or BRIEF 2 (Gioia et al., 2015) | EF | Farbiash & Berger (2016)  Wagner et al. (2019) |
| DuPaul Attention Deficit Hyperactivity Disorder Rating Scale (DuPaul et al., 1998) | Emotion regulation | Ozyurt et al. (2017) |
| Emotion Regulation Checklist (ERC; Shields & Cicchetti, 1997) | Emotion regulation | Ozyurt et al. (2017) |
| BRIEF-P (Gioia et al., 1996) | EF | O'Meagher et al. (2017) |
| EYT Child Self-Regulation and Behavior Questionnaire (CSBQ; Howard & Melhuish, 2017) | Self-regulation and social development | Howard & Melhuish (2017) |
| Parental Acceptance Rejection Questionnaire (Rohner et al., 2005) | Parental acceptance and rejection | Tasoren (2016) |
| Preschool and Kindergarten Behavior Scale (PKBS; (Merrell, 1995) | Social skills and problem behavior | Wolfe et al. (2015) |
| Social Competence and Behavior Evaluation (SCBE-30; LaFreniere, 1990) | Anxiety/withdrawal, anger/aggression, or social competence | Wolfe et al. (2015) |
| Children’s Behavior Questionnaire (CBQ; Rothbart et al., 2001) | Temperament, effortful control | Wolfe et al. (2015)  Johns et al. (2019) |
| Social Behaviors Questionnaire (Tremblay et al., 1991) | Self-regulation | Piche et al. (2015) |
| Student’s Achievement-Relevant Actions in the Classroom: Engagement Versus Disaffection with Learning (SARAC; Skinner et al., 2009; Wellborn, 1992) | Students’ engagement with learning: behavioral engagement, emotional engagement, behavioral disaffection, and emotional disaffection | Garrett-Peters et al. (2019) |
| Teacher Sutter-Eyberg Student Behavior Inventory-Revised (SESBI-R; Eyberg & Pincus, 1999) | Disruptive behavior | Wagner et al. (2019) |
| Parent Eyberg Child Behavior Inventory (ECBI; Eyberg & Pincus, 1999) | Disruptive behavior | Wagner et al. (2019) |
| Child Emotional Expression Scale-Mother Form (Mirabile, 2008) | Levels of positive and negative expressions of preschool children | Ersan & Tok (2020) |
| Emotion Regulation Scale (Shields & Cicchetti, 1997) | Emotional responsiveness of children and the expression and regulation of the emotions within the environment children experience | Ersan & Tok (2020) |
| Social- Emotional Assets and Resiliency Scales (SEARS; Merrell et al., 2011) | Social emotional, knowledge, peer acceptance and relationships, resilience in the face of difficulties, coping skills, problem-solving abilities, empathy, global self-concept, and other positive traits | Graves Jr et al. (2017) |
| **Child self-report measures** | | |
| Abbreviation of the Total Mood Disturbance scale | Overall negative mood | Annesi et al. (2016) |
| Academic Self- Regulation Questionnaire (Ryan & Connell, 1989) | Academic self-regulation style | Gorissen et al. (2015) |
| Brief Self-Control Scale for children (Rauch et al., 2014) | Domain-specific mathematics self-regulation | Gunzenhauser & Saalbach (2020) |
| Child Personality Assessment Questionnaire (Rohner et al., 2005) | Psychological adjustment | Tasoren (2016) |
| Child Social Preference Questionnaire (Coplan et al., 2013) | Unsociability | Sang et al. (2018) |
| Child-Adolescent Social Support Scale (CASS; Malecki & Demaray, 2002) and adapted by Yardımcı and Başbakkal (2009) | Perceived social support | Ogurlu et al. (2018) |
| Childhood Depression Inventory (Kovacs, 1992) | Depression | Sang et al. (2018) |
| Children’s Shyness Questionnaire (Crozier, 1995) | Emotional and behavior components of shyness | Sang et al. (2018) |
| Children's Perceived Use of Self-Regulated Learning Inventory (Vandevelde et al., 2013) | SRL strategies | Heirweg et al. (2019) |
| Cognitive Flexibility Task (Roebers et al., 2011) | EF- attention shifting | Meixner et al. (2019) |
| Difficulties in Emotion Regulation Scale (DERS; Gratz & Roemer, 2004) | Emotion regulation | Ozyurt et al. (2017) |
| Digit Span Backwards Task (Petermann & Petermann, 2007) | EF- updating | Meixner et al. (2019) |
| Effective Input Characteristics for Math Scale (Caliskan & Serce, 2016) | SRL strategies | Karademir & Deveci (2019) |
| Emotion Regulation Checklist (ERC; Shields & Cicchetti, 1997) | Emotion regulation | Ozyurt et al. (2017) |
| Friendship Quality Questionnaire (Parker & Asher, 1993) | Friendship quality | Li-Grining et al. (2019) |
| Intrinsic Motivation Inventory Dutch translations (Ilardi et al., 1993; Kasser et al., 1992; Ryan, 1982) | Task motivation and need fulfilment | Gorissen et al. (2015) |
| KA-SI Empathic Tendency Scale for Children and Adolescents (Kaya & Siyez, 2010) | Empathic tendencies | Ozyurt et al. (2017) |
| Motivated Strategies for Learning Questionnaire (García & Pintrich, 1995) | SRL strategies | Alnafea & Curtis (2017) |
| Peer nominations | Peer victimization | Sang et al. (2018) |
| Perceived Self-Regulation Scale (Arslan & Gelisli, 2015) | Self-regulation | Karademir & Deveci (2019) |
| Self-regulation for physical activity scale | Use of methods for self-regulation/self-management | Annesi et al. (2016) |
| Self-Regulation Scale (Novak & Clayton, 2001) | Emotion regulation | Sang et al. (2018) |
| Self-Report Measure of Social Avoidance (Sang et al., 2018) | Social avoidance | Sang et al. (2018) |
| Social Anxiety Scale for Children- Revised (La Greca & Stone, 1993) | Social anxiety | Sang et al. (2018) |
| Social- Emotional Assets and Resiliency Scales (SEARS; Merrell et al., 2011) | Social emotional, knowledge, peer acceptance and relationships, resilience in the face of difficulties, coping skills, problem-solving abilities, empathy, global self-concept, and other positive traits | Graves Jr et al. (2017) |
| Social Emotional Learning Skills Scale (SELSS; Kabakci & Korkut-Owen, 2010) | Social–emotional learning (Task Articulation, Peer Relationships, and Self-Regulation) | Ogurlu et al. (2018) |
| Social Skills Rating System (SSRS; Gresham & Elliott, 1990) | Social behaviors | Dang et al. (2017) |
| Social-Emotional Competence from the standardized Intelligence and Development Scales (IDS; Grob et al., 2009) | Social-emotional competence | Eichler et al. (2017) |
| Student Behavior Questionnaire (SBQ; Weiss et al., 2003) | Problem behavior | Dang et al. (2017) |
| The Fruit Stroop Task (Roebers et al., 2011) | EF- inhibition | Meixner et al. (2019) |
| **Academic performance measures** | | |
| English oral task and vocabulary task |  | Costa Ferreira et al. (2015) |
| The Voluntary Pre-Kindergarten Assessment (Florida Department of Education, 2011) |  | Allan et al. (2015) |
| **Task-specific test measures** | | |
| Assessment as a scaffolded, three-phase learning process, in line with SRL theory (forethought, performance and self-reflection) and interviews (Fletcher, 2016) | SRL | Fletcher (2016) |
| Auditory continuous performance test (A-CPT; Rosvold et al., 1956)  Dot CPT (Herman et al., 1980)  Visual continuous performance test (V-CPT; Rosvold et al., 1956) | EF | Allan et al. (2015) |
| Cued recall test (Heirweg et al., 2019) | Knowledge recall | Heirweg et al. (2019) |
| Diary task The Diary of Guided Self-regulated learning (DOGS-RL; Costa Ferreira et al., 2015) | Self-regulated learning (SRL) | Costa Ferreira et al. (2015) |
| Flanker (Rueda et al., 2004) | Selective attention | Bernier et al. (2015) |
| Think-aloud protocol (TAP) analysis (Ericsson & Simon, 1980) | SRL | Vandevelde et al. (2015) |
| Wisconsin Card Sorting Test (Arffa et al., 1998) | EF | Tasoren (2016) |
| **Observational/administered measures** | | |
| Arbeitsgedächtnistestbatterie für Kinder von 5 bis 12 Jahren (Working memory test battery for children aged 5 to 12) [AGTB 5-12]  Object Span, Digit Span Backwards, Corsi block, Go/No go, Stroop test (Hasselhorn et al., 2012) | EF- working memory | Gunzenhauser & Saalbach (2020) |
| Attachment Behavior Q-Sort (Waters, 1995) | Child attachment | Bernier et al. (2015) |
| Auditory go/no go (Salles et al., 2011) | EF | Czermainski et al. (2015) |
| Backward Word Span (Carlson et al., 2002) | EF | Bernier et al. (2015) |
| Backward Word Span (Davis & Pratt, 1995) | EF | Sasser et al. (2015) |
| Battery of effortful control tasks (the toy wrap, toy wait, snack delay, and tongue tasks), battery of low-level executive function tasks (the balance beam task and the pencil tap task) (Murray & Kochanska, 2002) | Effortful control | Li-Grining et al. (2019) |
| Bear/Dragon (Reed et al., 1984)  Day/Night (Gerstadt et al., 1994) | EF | Bernier et al. (2015) |
| Bells Test (Biancardi & Stoppa, 1997) | Attention performance- selective attention | Scrimin et al. (2018) |
| Boxall profile (Education Endowment Foundation, 2019) | Social, emotional, and behavioral development | Sloan et al. (2020) |
| Checklist of Psychomotor Activities (CPA; Romero Martínez et al., 2018) | Psycho-motor development: motor, perceptual and social-emotional | Gil Madrona et al. (2019) |
| Choice delay of gratification | EF- delayed gratification | Duran & Grissmer (2020) |
| Classroom climate (Volpe et al., 2009) | Classroom climate | Scrimin et al. (2018) |
| Copy Design (Osborn et al., 1984) | Task-based self-regulation - EF | Baron et al. (2020) |
| Corsi Blocks (Corsi, 1972) | Task-based self-regulation - EF | Baron et al. (2020) |
| Day Night Stroop (Gerstadt et al., 1994) | Inhibition and switching | O'Meagher et al. (2017) |
| Day/night (Kochanska et al., 1996)  Grass/snow (Carlson & Moses, 2001)  Head-to-toes (Ponitz et al., 2009)  Knock/tap of the Developmental  Listening span (Pickering & Gathercole, 2001)  Size ordering (McInerney et al., 2005)  Word span reversed (Wechsler & Kodama, 1949) | EF | Allan et al. (2015) |
| Delay of Gratification (DoG) | Delayed gratification | Fishbein et al. (2016) |
| Developmental Neuropsychological Assessment battery (NEPSY II; Korkman et al., 2007) | EF | O'Meagher et al. (2017) |
| Digit span (backward) | Attention | Czermainski et al. (2015 |
| Digit Span (DS) test (Wechsler, 1987) | EF/verbal working memory | van der Niet et al. (2016) |
| Dimensional Change Card Sort (DCCS; Zelazo, 2006) | EF  Cognitive flexibility | Bernier et al. (2015)  Sasser et al. (2015)  Schmitt et al. (2017) (adaptation of)  Wang & Fitzpatrick (2019)  Baron et al. (2020) |
| Distractibility and Go/No Go subtests from the Test of Attentional Performance for Children (Zimmermann et al., 2005) | Self-control | McKown et al. (2016) |
| Early Years Foundation Stage (EYFS) framework (UK Government Department for Education, 2014) | Communication and language  Physical development  Personal, social and emotional development  Literacy  Mathematics  Understanding the world  Expressive arts and design | See & Ibbotson (2018) |
| Emotion Understanding Assessment (EUA; Howlin et al., 1999) | Identify the emotions and facial expressions of other children | Wolfe et al. (2015) |
| Emotion-induction manipulation check | Enjoyment (reversed), annoyance, and subjective success | Farbiash & Berger (2016) |
| FACES task (Ekman, 1976) | Facial emotion recognition | Fishbein et al. (2016) |
| Golden Stroop test (Golden & Freshwater, 1978) | EF/inhibition | van der Niet et al. (2016) |
| Greek Test for the Assessment of Executive Functions (Simos et al., 2007) | EF | Papaioannou et al. (2016) |
| Head-Toes-Knees-Shoulders (HTKS; McClelland et al., 2007; Ponitz et al., 2008) | EF  Children’s self-regulatory skills | Chung et al. (2017)  Schmitt et al. (2017)  Pelletier & Fesseha (2019)  Garrett-Peters et al. (2019)  Lonigan et al. (2017)  Baron et al. (2020)  Duran & Grissmer (2020) |
| Inhibitory control tasks [spatial conflict arrows, silly sounds Stroop, animal go/no-go], two working memory tasks [working memory span, pick the picture], and one attention-shifting task [something’s the same] (Willoughby et al., 2012) | EF | Halldorsdottir et al. (2019) |
| Kaufman Brief Intelligence Test, Second Edition (KBIT-2; Kaufman, 1990) | Intelligence and cognitive functioning | Fishbein et al. (2016) |
| Kindergarten Student Entrance Profile (KSEP; Quirk et al., 2014) | School readiness at the time of kindergarten entry | Edyburn et al. (2017) |
| Letter knowledge subscale of the Lollipop test (Chew & Morris, 1984) | Cognition | Bernier et al. (2015) |
| Nebraska Barnyard Task (Dennis et al., 1991);  (Hughes et al., 1998) | Working memory | Wolfe et al. (2015) |
| NEPSY (Korkman et al., 1998) Developmental Neuropsychological Assessment battery (NEPSY II; Korkman et al., 2007) | EF- selective attention, inhibitory control, and cognitive flexibility | Allan et al. (2015)  Brock et al. (2018) |
| NEPSY Tower (Korkman et al., 1998) | Planning | Bernier et al. (2015) |
| Peg Tapping (Luria, 1966) | Task-based self-regulation - EF | Baron et al. (2020) |
| Peg tapping task (Diamond & Taylor, 1996) | EF- working memory and inhibitory control | Sasser et al. (2015) |
| Peg-Tapping Task (Diamond & Taylor, 1996) | Motor impulsivity | Fishbein et al. (2016) |
| Pencil tapping task (Blair, 2002; Diamond & Taylor, 1996; Smith-Donald et al., 2007) | EF | Annesi et al. (2016) |
| Preschool Self-Regulation Assessment (Smith-Donald et al., 2007) | Self-regulation- effortful control and lower-level EF | Li-Grining et al. (2019) |
| Schedule for Classroom Activity Norms (SCAN) (McKinney & Feagans, 1983) | Student engagement- task-oriented and social behaviors | Garrett-Peters et al. (2019) |
| SELweb modules (McKown et al., 2016): | Facial emotion recognition  Social perspective-taking  Social problem-solving  Delay of gratification and frustration tolerance | McKown et al. (2016) |
| Shape School Task (Espy et al., 2006) | Executive control | Wolfe et al. (2015) |
| Shape School Task (Espy, 1997) | Inhibition and switching | O'Meagher et al. (2017) |
| Simon Says task (Carlson, 2005; Strommen, 1973) | Inhibitory control | Schmitt et al. (2017) |
| SIP-AP (Kupersmidt et al., 2011) | Social reasoning | McKown et al. (2016) |
| Social Problem-Solving Task-Revised (SPST-R; Rubin & Krasnor, 1986); (Rubin, 1988) | Social problem solving | Wolfe et al. (2015) |
| Strong Start Content Knowledge Assessment (SSCK) | Emotion identification, emotion recognition in others, and basic social problem-solving strategies | Graves Jr et al. (2017) |
| Stroop test (Golden & Freshwater, 1978) | Cognitive flexibility, inhibition, and attentional control | Czermainski et al. (2015) |
| Stroop type task (happy/sad version) (Lagattuta et al., 2011) | Inhibitory control | Scrimin et al. (2018) |
| Sustained Attention and Inattention Behavior During Classroom Activities- The Direct Observation Form | Student behavior | Scrimin et al. (2018) |
| The Early Years Toolbox (EYT; Howard & Melhuish, 2017) | Battery of iPad-based EF, language, self-regulation, and social development measures | Howard & Melhuish (2017) |
| The emotion-induction Go/No Go task (Lewis et al., 2006) | Response inhibition during a negative emotional situation | Farbiash & Berger (2016) |
| The Forward (FS) and Backward Digit Span (BS) (Wechsler, 1991) | EF | Chung et al. (2017) |
| The Puzzle Box Task (Feagans & Short, 1986) | EF | Garrett-Peters et al. (2019) |
| Theory of Mind Task (Wellman & Liu, 2004) | Understanding of other persons’ mental states across five situational tasks | Wolfe et al. (2015) |
| Tower of London (Shallice, 1982) | EF/planning and sequencing behavior toward a goal | van der Niet et al. (2016) |
| Trail Making Test (Capovilla et al., 2007) | Divided attention, speed of information processing, cognitive flexibility, and alternation | Czermainski et al. (2015) |
| Trail making test (TMT; Reitan, 1971) | EF/cognitive flexibility | van der Niet et al. (2016) |
| Visual Memory Span (VMS; Wechsler, 1987) | EF/visuospatial working memory | van der Niet et al. (2016) |
| Wechsler Preschool and Primary Scale of Intelligence, 3rd edition (WPPSI-III; Wechsler, 2012) | General intelligence and cognitive functioning | O'Meagher et al. (2017) |
| Wechsler Preschool and Primary Scales of Intelligence-Third Edition (WPPSI-III; Wechsler, 2002) | Cognitive ability | Wolfe et al. (2015) |
| Whack-A-Mole (Go/No Go task) | Inhibitory control | Fishbein et al. (2016) |
| Woodcock-Johnson III Tests of Achievement (Woodcock et al., 2007) | EF | Halldorsdottir et al. (2019)  Sasser et al. (2015)  Schmitt et al. (2017)  Wang & Fitzpatrick (2019)  Johns et al. (2019)  Stormont et al. (2019) |

EF= executive functioning

**References**

Achenbach, T. (1991). Integrative guide for the 1991 CBCL/4-18, YSR, and TRF profiles, University of Vermont Department of Psychiatry, Burlington, VT. *Ackerman, PT, Newton, JE, McPHerson, WB, Jones, JG, & Dykman, RA*.

Achenbach, T., & Rescorla, L. (2001). *ASEBA school-age forms & profiles.* Research Center for Children, Youth and Families.

*Aikens, N., Malone, L., Klein, A. K., West, J., & Tarullo, L. (2017). Head Start Children’s Developmental Progress and Kindergarten Experiences. *Office of Planning, Research and Evaluation: An Office of the Administration for Children and Families. Retrieved February*, *11*, 2021.

*Allan, D. M., Allan, N. P., Lerner, M. D., Farrington, A. L., & Lonigan, C. J. (2015). Identifying unique components of preschool children's self-regulatory skills using executive function tasks and continuous performance tests. *Early Childhood Research Quarterly*, *32*, 40-50. https://doi.org/http://dx.doi.org/10.1016/j.ecresq.2015.02.001

*Alnafea, T., & Curtis, D. D. (2017). Influence of mothers' parenting styles on self-regulated academic learning among Saudi primary school students. *Issues in Educational Research*, *27*(3), 399-416.

*Annesi, J. J., Walsh, S. M., & Greenwood, B. L. (2016). Increasing children’s voluntary physical activity outside of school hours through targeting social cognitive theory variables. *Journal of primary care & community health*, *7*(4), 234-241.

Arffa, S., Lovell, M., Podell, K., & Goldberg, E. (1998, 1998/11/01/). Wisconsin Card Sorting Test Performance in Above Average and Superior School Children: Relationship to Intelligence and Age. *Archives of Clinical Neuropsychology, 13*(8), 713-720. https://doi.org/https://doi.org/10.1016/S0887-6177(98)00007-9

Arslan, S., & Gelisli, Y. (2015). Development of perceived self-regulation scale: Validity and reliability study. *Sakarya University Journal of Education, 5*(3), 67-74.

*Baron, A., Malmberg, L.-E., Evangelou, M., Nesbitt, K., & Farran, D. (2020). The play's the thing: Associations between make-believe play and self-regulation in the Tools of the Mind Early Childhood Curriculum. *Early Education and Development, 31*(1), 66-83. https://doi.org/http://dx.doi.org/10.1080/10409289.2019.1613327

*Bergold, S., Christiansen, H., & Steinmayr, R. (2019). Interrater agreement and discrepancy when assessing problem behaviors, social‐emotional skills, and developmental status of kindergarten children. *Journal of Clinical Psychology*, *75*(12), 2210-2232.

*Bernier, A., Beauchamp, M. H., Carlson, S. M., & Lalonde, G. (2015). A secure base from which to regulate: Attachment security in toddlerhood as a predictor of executive functioning at school entry. *Developmental Psychology*, *51*(9), 1177-1189. https://doi.org/http://dx.doi.org/10.1037/dev0000032

Biancardi, A., & Stoppa, E. (1997). Il test delle Campanelle modificato: una proposta per lo studio dell'attenzione in etá evolutiva. *Psichiatria dell'Infanzia e dell'Adolescenza*.

Blair, C. (2002). School readiness: Integrating cognition and emotion in a neurobiological conceptualization of children's functioning at school entry. *American psychologist, 57*(2), 111.

*Brock, L. L., Murrah, W. M., Cottone, E. A., Mashburn, A. J., & Grissmer, D. W. (2018).

An after-school intervention targeting executive function and visuospatial skills also improves classroom behavior. *International Journal of Behavioral Development, 42*(5), 474-484. https://doi.org/http://dx.doi.org/10.1177/0165025417738057

Caliskan, M., & Serce, H. (2016). Affective entry characteristics scale for mathematics: A study of reliability and validity. *International Eurasia Journal of Social Sciences, 7*(22), 137-160.

Capovilla, A. G. S., dos Santos Assef, E. C., & Cozza, H. F. P. (2007). Avaliação neuropsicológica das funções executivas e relação com desatenção e hiperatividade. *Avaliação psicológica, 6*(1), 51-60.

Carlson, S. M. (2005). Developmentally sensitive measures of executive function in preschool children. *Developmental Neuropsychology, 28*(2), 595-616.

Carlson, S. M., & Moses, L. J. (2001). Individual differences in inhibitory control and children's theory of mind. *Child development, 72*(4), 1032-1053.

Carlson, S. M., Moses, L. J., & Breton, C. (2002). How specific is the relation between executive function and theory of mind? Contributions of inhibitory control and working memory. *Infant and Child Development: An International Journal of Research and Practice, 11*(2), 73-92.

*Carroll, A., Houghton, S., Forrest, K., McCarthy, M., & Sanders-O'Connor, E. (2020). Who benefits most? Predicting the effectiveness of a social and emotional learning intervention according to children's emotional and behavioural difficulties. *School Psychology International*, *41*(3), 197-217. https://doi.org/10.1177/0143034319898741

*Carroll, A., McCarthy, M., Houghton, S., & Sanders O'Connor, E. (2020). Evaluating the effectiveness of KooLKIDS: An interactive social emotional learning program for Australian primary school children. *Psychology in the Schools*, *57*(6), 851-867. https://doi.org/10.1002/pits.22352

*Chanfreau, J., Tanner, E., Callanan, M., Laing, K., Skipp, A., & Todd, L. (2016). *Out of School Activities during Primary School and KS2 Attainment. Centre for Longitudinal Studies Working Paper 2016/1*.

Chew, A. L., & Morris, J. D. (1984). Validation of the Lollipop Test: A diagnostic screening test of school readiness. *Educational and psychological measurement, 44*(4), 987-991.

*Chung, K. K. H., Liu, H., McBride, C., Wong, A. M. Y., & Lo, J. C. M. (2017). How Socioeconomic Status, Executive Functioning and Verbal Interactions Contribute to Early Academic Achievement in Chinese Children. *Educational Psychology*, *37*(4), 402-420. https://doi.org/http://dx.doi.org/10.1080/01443410.2016.1179264

Collaborative for Academic Social and Emotional Learning and American Institutes for Research. (2013). *Teacher rating of student social and emotional competencies*. Author.

Conduct Problems Prevention Research Group. (1995). *Teacher–Social Competence Scale*. http://www.fasttrackproject.org

Cooper, D. H., & Farran, D. C. (1991). *The Cooper-Farran behavioral rating scales*. Clinical Psychology Publishing Company, Incorporated.

Coplan, R. J., Rose-Krasnor, L., Weeks, M., Kingsbury, A., Kingsbury, M., & Bullock, A. (2013). Alone is a crowd: Social motivations, social withdrawal, and socioemotional functioning in later childhood. *Developmental psychology, 49*(5), 861. https://doi.org/https://doi.org/10.1037/a0028861

Corsi, P. M. (1972). Human memory and the medial temporal region of the brain.

*Costa Ferreira, P., Veiga Simão, A. M., & Lopes da Silva, A. (2015). Does training in how to regulate one's learning affect how students report self-regulated learning in diary tasks? *Metacognition and Learning, 10*(2), 199-230. https://doi.org/http://dx.doi.org/10.1007/s11409-014-9121-3

Crick, N. R., Casas, J. F., & Mosher, M. (1997). Relational and overt aggression in preschool. *Developmental psychology, 33*(4), 579.

Crozier, W. R. (1995). Shyness and self‐esteem in middle childhood. *British Journal of Educational Psychology, 65*(1), 85-95. https://doi.org/https://doi.org/10.1111/j.2044-8279.1995.tb01133.x

*Czermainski, F. R., Bosa, C. A., Mina, C. S., Meimes, M. A., Miranda, M. C., Carim, D., & de Salles, J. F. (2015). Performance of children/adolescents with autism spectrum disorders in executive function: Study of case series. *Psychology and Neuroscience*, *8*(3), 305-320. https://doi.org/http://dx.doi.org/10.1037/h0101279

*Dan, A. (2016). Supporting and developing self-regulatory behaviours in early childhood in young children with high levels of impulsive behaviour. *Contemporary Issues in Education Research, 9*(4), 189-200.

*Dang, H. M., Weiss, B., Nguyen, C. M., Tran, N., & Pollack, A. (2017). Vietnam as a case example of school-based mental health services in low and middle income countries: Efficacy and effects of risk status. *School psychology international, 38*(1), 22-41.

Davis, H. L., & Pratt, C. (1995). The development of children's theory of mind: The working memory explanation. *Australian Journal of Psychology, 47*(1), 25-31.

Dennis, M., Spiegler, B., Hoffman, H., Hendrick, E., Humphreys, R., & Becker, L. (1991). Brain tumors in children and adolescents: Effects on working, associative and serial-order memory of IQ, age at tumor onset and age of tumor. *Neuropsychologia, 29*(9), 813-827. https://doi.org/https://doi.org/10.1016/0028-3932(91)90049-E

Diamond, A., & Taylor, C. (1996). Development of an aspect of executive control: Development of the abilities to remember what I said and to “Do as I say, not as I do”. *Developmental psychobiology, 29*(4), 315-334.

Döpfner, M., Berner, W., Fleischmann, T., & Schmidt, M. (1993). *Verhaltensbeurteilungsbogen für Vorschulkinder (VBV 3‐6) [Questionnaire for Assessing Preschool Children’s Behavior]*. Beltz.

Doromal, J. B., Cottone, E. A., & Kim, H. (2019). Preliminary validation of the teacher-rated DESSA in a low-income, kindergarten sample. *Journal of Psychoeducational Assessment, 37*(1), 40-54.

Downer, J. T., Booren, L. M., Lima, O. K., Luckner, A. E., & Pianta, R. C. (2010). The Individualized Classroom Assessment Scoring System (inCLASS): Preliminary reliability and validity of a system for observing preschoolers’ competence in classroom interactions. *Early Childhood Research Quarterly, 25*(1), 1-16.

DuPaul, G. J., Power, T. J., Anastopoulos, A. D., & Reid, R. (1998). *ADHD Rating Scale-IV: Checklists, norms, and clinical interpretation*. Guilford Press.

DuPaul, G. J., Power, T. J., Anastopoulos, A. D., Reid, R., McGoey, K. E., & Ikeda, M. J. (1997). Teacher ratings of attention deficit hyperactivity disorder symptoms: Factor structure and normative data. *Psychological assessment, 9*(4), 436.

*Duran, C. A. K., & Grissmer, D. W. (2020). Choosing immediate over delayed gratification correlates with better school-related outcomes in a sample of children of color from low-income families. *Developmental Psychology*, *56*(6), 1107. https://doi.org/http://dx.doi.org/10.1037/dev0000920

Education Endowment Foundation. (2019). *Early Years Measures Database Education Endowment Foundation*. https://educationendowmentfoundation.org.uk/projects-and-evaluation/evaluating-projects/early-years-measure-database/early-years-measures-database/

*Edyburn, K. L., Quirk, M., & Furlong, M. (2017). Measurement invariance of a school readiness screener for use in preschool and kindergarten. *Early Education and Development*, *28*(7), 810-821.

*Eichler, A., Walz, L., Grunitz, J., Grimm, J., Van Doren, J., Raabe, E., Goecke, T., Fasching, P., Beckmann, M., Kornhuber, J., Kratz, O., Heinrich, H., & Moll, G. (2017). Children of prenatally depressed mothers: Externalizing and internalizing symptoms are accompanied by reductions in specific social-emotional competencies. *Journal of Child & Family Studies*, *26*(11), 3135-3144. https://doi.org/10.1007/s10826-017-0819-0

Ekman, P. (1976). Pictures of facial affect. *consulting psychologists press*.

Entwistle, D. R., Alexander, K., & Olson, L. (1997). *Children, Schools and Inequality. Boulder*. Westview Press

Ericsson, K. A., & Simon, H. A. (1980). Verbal reports as data. *Psychological review, 87*(3), 215.

*Ersan, C., & Tok, Ş. (2020). The study of the aggression levels of preschool children in terms of emotion expression and emotion regulation. *Egitim ve Bilim*, *45*(201).

Espy, K. A. (1997). The Shape School: Assessing executive function in preschool children. *Developmental Neuropsychology, 13*(4), 495-499.

Espy, K. A., Bull, R., Martin, J., & Stroup, W. (2006). Measuring the development of executive control with the shape school. *Psychological assessment, 18*(4), 373. https://doi.org/https://doi.org/10.1037/1040-3590.18.4.373

Evidence-based Prevention and Intervention Supports Centre. (2014). *PATHS®️ (Promoting Alternative Thinking Strategies)*. http://www.episcenter.psu.edu/index.php/ebp/paths

Eyberg, S. M., & Pincus, D. (1999). Eyberg child behavior inventory and sutter-eyberg student behavior inventory-revised: Professional manual. *Phychological Assessment Resources*.

*Farbiash, T., & Berger, A. (2016). Brain and behavioral inhibitory control of kindergartners facing negative emotions. *Developmental Science*, *19*(5), 741-756. https://doi.org/https://dx.doi.org/10.1111/desc.12330

Feagans, L., & Short, E. J. (1986). Referential communication and reading performance in learning disabled children over a 3-year period. *Developmental psychology, 22*(2), 177.

*Firoozi, M., & Rouhi, S. (2020). Psychological problems in boys with acute myeloid leukemia (AML) with central nervous system (CNS) involvement; a descriptive study. *International Journal of Cancer Management*, *13 (2) (no pagination)*(e96851). https://doi.org/http://dx.doi.org/10.5812/ijcm.96851

*Fishbein, D. H., Domitrovich, C., Williams, J., Gitukui, S., Guthrie, C., Shapiro, D., & Greenberg, M. (2016). Short-term intervention effects of the PATHS curriculum in young low-income children: Capitalizing on plasticity. *Journal of Primary Prevention*, *37*(6), 493-511. https://doi.org/http://dx.doi.org/10.1007/s10935-016-0452-5

*Fletcher, A. K. (2016). Exceeding expectations: scaffolding agentic engagement through assessment as learning Article. *Educational Research, 58*(4), 400-419. https://doi.org/10.1080/00131881.2016.1235909

Florida Department of Education. (2011). *Florida voluntary prekindergarten assessment.*

García, T., & Pintrich, P. R. (1995). Assessing students' motivation and learning strategies: The Motivated Strategies for Learning Questionnaire.

*Garrett-Peters, P. T., Mokrova, I. L., Carr, R. C., & Vernon-Feagans, L. (2019). Early student (dis)engagement: Contributions of household chaos, parenting, and self-regulatory skills. *Developmental Psychology*, *55*(7), 1480-1492. https://doi.org/10.1037/dev0000720

*Gatzke-Kopp, L. M., Greenberg, M., & Bierman, K. (2015). Children's parasympathetic reactivity to specific emotions moderates response to intervention for early-onset aggression. *Journal of Clinical Child and Adolescent Psychology, 44*(2), 291. https://doi.org/http://dx.doi.org/10.1080/15374416.2013.862801

Gerstadt, C. L., Hong, Y. J., & Diamond, A. (1994). The relationship between cognition and action: performance of children 312–7 years old on a stroop-like day-night test. *Cognition, 53*(2), 129-153.

*Gil Madrona, P., Romero Martínez, S. J., Sáez-Gallego, N. M., & Ordóñez Camacho, X. G. (2019). Psychomotor limitations of overweight and obese five-year-old children: Influence of body mass indices on motor, perceptual, and social-emotional skills. *International Journal of Environmental Research and Public Health*, *16*(3), 427.

Gioia, G. A., Andrwes, K., & Isquith, P. K. (1996). *Behavior rating inventory of executive function-preschool version (BRIEF-P)*. Psychological Assessment Resources Odessa, FL.

Gioia, G. A., Isquith, P. K., Guy, S. C., & Kenworthy, L. (2015). *BRIEF: Behavior rating inventory of executive function*. Psychological Assessment Resources Lutz, FL.

Golden, C. J., & Freshwater, S. M. (1978). Stroop color and word test.

Goodman, R. (1997). The Strengths and Difficulties Questionnaire: a research note. *Journal of child psychology and psychiatry, 38*(5), 581-586.

*Gorgoz, S., & Tican, C. (2020). Investigation of middle school students' self-regulation skills and vocabulary learning strategies in foreign language. *International Journal of Educational Methodology*, *6*(1), 25-42.

*Gorissen, C. J. J., Kester, L., Brand-Gruwel, S., & Martens, R. (2015). Autonomy supported, learner-controlled or system-controlled learning in hypermedia environments and the influence of academic self-regulation style. *Interactive Learning Environments*, *23*(6), 655-669. https://doi.org/10.1080/10494820.2013.788038

Gottfried, M. A. (2014). Classmates With Disabilities and Students’ Noncognitive Outcomes. *Educational Evaluation and Policy Analysis, 36*(1), 20-43. https://doi.org/10.3102/0162373713493130

*Gottfried, M. A., & Le, V. N. (2016). Full-versus part-day kindergarten for children with disabilities: Effects on academic and social-emotional outcomes. *American Educational Research Journal*, *53*(3), 708-744.

Gratz, K. L., & Roemer, L. (2004). Multidimensional assessment of emotion regulation and dysregulation: Development, factor structure, and initial validation of the difficulties in emotion regulation scale. *Journal of psychopathology and behavioral assessment, 26*(1), 41-54.

*Graves Jr, S. L., Herndon-Sobalvarro, A., Nichols, K., Aston, C., Ryan, A., Blefari, A., Schutte, K., Schachner, A., Vicoria, L., & Prier, D. (2017). Examining the effectiveness of a culturally adapted social-emotional intervention for African American males in an urban setting. *School Psychology Quarterly*, *32*(1), 62. https://doi.org/10.1037/spq0000145

Gresham, F. M., & Elliott, S. N. (1990). *Social skills rating system (SSRS)*. American Guidance Service.

Gresham, F. M., & Elliott, S. N. (2008). *Social skills improvement system: Rating scales manual*. NCS Pearson.

Grob, A., Hagmann-von Arx, P., & Meyer, C. S. (2009). *Intelligence and development scales: IDS; Intelligenz-und Entwicklungsskalen für Kinder von 5-10 Jahren*.

*Gunzenhauser, C., & Saalbach, H. (2020). Domain-specific self-regulation contributes to concurrent but not later mathematics performance in elementary students. *Learning & Individual Differences*, *78*, N.PAG-N.PAG. https://doi.org/10.1016/j.lindif.2020.101845

*Halldorsdottir, T. P., Kurtoic, D. M. S., Müller-Myhsok, B. P., Binder, E. B. M. D. P., & Blair, C. P. (2019). Neurobiology of self-regulation: Longitudinal influence of FKBP5 and Intimate partner violence on emotional and cognitive development in childhood. *The American Journal of Psychiatry*, *176*(8), 626. https://doi.org/http://dx.doi.org/10.1176/appi.ajp.2019.18091018

*Hanin, V., & Van Nieuwenhoven, C. (2020). An exploration of the cognitive, motivational, emotional and regulatory behaviours of elementary-school novice and expert problem solvers. *Canadian Journal of Science, Mathematics and Technology Education*, *20*(2), 312-341.

Harbarth, S., Steinmayr, R., Neidhardt, E., & & Christiansen, H. (2017). *Conners Skalen zu Aufmerksamkeit, Verhalten und Entwicklungsmeilensteinen im Vorschulalter (Conners EC) [Conners Scales for Attention, Behavior, and Developmental Milestones in Preschool Age]* Hogrefe.

Hasselhorn, M., Schumann-Hengsteler, R., Gronauer, J., Grube, D., Mähler, C., Schmid, I., & Zoelch, C. (2012). *AGTB 5–12. Arbeitsgedächtnistestbatterie für Kinder von 5 bis 12 Jahren [Working memory test battery for children aged 5 to 12]*. Hogrefe.

*Heirweg, S., De Smul, M., Devos, G., & Van Keer, H. (2019). Profiling upper primary school students' self-regulated learning through self-report questionnaires and think-aloud protocol analysis. *Learning & Individual Differences*, *70*, 155-168. https://doi.org/10.1016/j.lindif.2019.02.001

Herman, C. S., Kirchner, G. L., Streissguth, A. P., & Little, R. E. (1980). Vigilance paradigm for preschool children used to relate vigilance behavior to IQ and prenatal exposure to alcohol. *Perceptual and Motor Skills*.

Hogan, A. E., Scott, K. G., & Bauer, C. R. (1992). The Adaptive Social Behavior Inventory (ASBI): A new assessment of social competence in high-risk three-year-olds. *Journal of Psychoeducational Assessment, 10*(3), 230-239.

*Howard, S. J., & Melhuish, E. (2017). An Early Years Toolbox for assessing early executive function, language, self-regulation, and social development: validity, reliability, and preliminary norms. *Journal of Psychoeducational Assessment, 35*(3), 255-275. https://doi.org/10.1177/0734282916633009

Howlin, P., Baron-Cohen, S., & Hadwin, J. (1999). *Teaching children with autism to mind-read: A practical guide*. John Wiley & Sons.

Hughes, C., Dunn, J., & White, A. (1998). Trick or treat?: Uneven understanding of mind and emotion and executive dysfunction in “hard-to-manage” preschoolers. *The Journal of Child Psychology and Psychiatry and Allied Disciplines, 39*(7), 981-994. https://doi.org/https://doi.org/10.1111/1469-7610.00401

*Humphrey, N., Barlow, A., Wigelsworth, M., Lendrum, A., Pert, K., Joyce, C., ... & Turner, A. (2016). A cluster randomized controlled trial of the Promoting Alternative Thinking Strategies (PATHS) curriculum. *Journal of school psychology*, *58*, 73-89.

Ilardi, B. C., Leone, D., Kasser, T., & Ryan, R. M. (1993). Employee and supervisor ratings of motivation: Main effects and discrepancies associated with job satisfaction and adjustment in a factory setting 1. *Journal of applied social psychology, 23*(21), 1789-1805.

*Johns, S. K., Valiente, C., Eisenberg, N., Spinrad, T. L., Hernandez, M. M., Southworth, J., Berger, R. H., Thompson, M. S., Silva, K. M., & Pina, A. A. (2019). Prediction of children's early academic adjustment from their temperament: The moderating role of peer temperament. *Journal of Educational Psychology*, *111*(3), 542-555. https://doi.org/http://dx.doi.org/10.1037/edu0000288

Kabakci, O., & Korkut-Owen, F. (2010). A study of development of social emotional learning skills scale. *Education and Science, 35*(157). https://doi.org/http://egitimvebilim.ted.org.tr/index.php/EB/article/view/293/162

Kamphaus, R. (2014). Behavior Assessment System for Children, (BASC‐2). *The encyclopedia of clinical psychology*, 1-6.

*Karademir, C. A., & Deveci, O. (2019). Secondary School Students' (11-14 Years) effective input characteristics for mathematics, self-regulation skills and self-esteem. *European Journal of Education Studies*, *5*(9), 264-287.

Kasser, T., Davey, J., & Ryan, R. M. (1992). Motivation and employee-supervisor discrepancies in a psychiatric vocational rehabilitation setting. *Rehabilitation Psychology, 37*(3), 175.

Kaufman, A. S. (1990). *Kaufman brief intelligence test: KBIT*. AGS, American Guidance Service Circle Pines, MN.

Kaya, A., & Siyez, D. M. (2010). KA-Sİ çocuk ve ergenler için empatik eğilim ölçeği: Geliştirilmesi geçerlik ve güvenirlik çalışması. *Eğitim ve Bilim, 35*(156).

Kochanska, G., Murray, K., Jacques, T. Y., Koenig, A. L., & Vandegeest, K. A. (1996). Inhibitory control in young children and its role in emerging internalization. *Child development, 67*(2), 490-507.

Korkman, M., Kirk, U., & Kemp, S. (1998). *Manual for the NEPSY: A Developmental Neuropsychological Assessment.* Psychological Testing Corporation.

Korkman, M., Kirk, U., & Kemp, S. (2007). *NEPSY II: Clinical and interpretive manual*. Harcourt Assessment, PsychCorp.

Koth, C. W., Bradshaw, C. P., & Leaf, P. J. (2009). Teacher observation of classroom adaptation—checklist: Development and factor structure. *Measurement and Evaluation in Counseling and Development, 42*(1). https://doi.org/https://doi.org/10.1177/0748175609333560

Kovacs, M. (1992). *Children's depression inventory: Manual*. Multi-Health Systems.

Kupersmidt, J. B., Stelter, R., & Dodge, K. A. (2011). Development and validation of the social information processing application: a Web-based measure of social information processing patterns in elementary school-age boys. *Psychological assessment, 23*(4), 834.

Kusche, C., & Greenberg, M. (1994). *The PATHS curriculum*. Developmental Research and Programs.

La Greca, A. M., & Stone, W. L. (1993). Social anxiety scale for children-revised: Factor structure and concurrent validity. *Journal of clinical child psychology, 22*(1), 17-27. https://doi.org/https://doi.org/10.1207/s15374424jccp2201_2

LaFreniere, P. (1990). *Socal competence and behavior evaluation-30* [Unpublished measure].

Lagattuta, K. H., Sayfan, L., & Monsour, M. (2011). A new measure for assessing executive function across a wide age range: Children and adults find happy‐sad more difficult than day‐night. *Developmental Science, 14*(3), 481-489.

*Lavoie, C., Couture, C., Bégin, J.-Y., & Massé, L. (2017). The differentiated impact of Kangaroo Class programmes in Quebec primary schools: Examining behavioural improvements in relation to student characteristics. *Emotional & Behavioural Difficulties*, *22*(3), 275-289. https://doi.org/10.1080/13632752.2017.1335118

LeBuffe, P. A., Shapiro, V. B., & Naglieri, J. (2009/2014). *The Devereux Student Strengths Assessment (DESSA): Assessment, technical manual, and user's guide*. Apperson, Inc.

Lewis, M. D., Lamm, C., Segalowitz, S. J., Stieben, J., & Zelazo, P. D. (2006). Neurophysiological correlates of emotion regulation in children and adolescents. *Journal of cognitive neuroscience, 18*(3), 430-443.

*Li-Grining, C. P., McKinnon, R. D., & Raver, C. C. (2019). Self-Regulation in early and middle childhood as a precursor to social adjustment among low-income, ethnic minority children. *Merrill-Palmer Quarterly*, *65*(3), 265-293. https://dx.doi.org/10.13110%2Fmerrpalmquar1982.65.3.0265

*Lonigan, C., Spiegel, J., Goodrich, J., Morris, B., Osborne, C., Lerner, M., Phillips, B., Lonigan, C. J., Spiegel, J. A., Goodrich, J. M., Morris, B. M., Osborne, C. M., Lerner, M. D., & Phillips, B. M. (2017). Does preschool self-regulation predict later behavior problems in general or specific problem behaviors?. *Journal of Abnormal Child Psychology*, *45*(8), 1491-1502. https://doi.org/10.1007/s10802-016-0260-7

Luria, A. (1966). Higher cortical functions in man. New York: Consultants Bureau Enterprises. *Inc. Diskussion*.

*Major, S., Seabra-Santos, M. J., & Martin, R. P. (2018). Latent profile analysis: another approach to look at parent–teacher agreement on preschoolers’ behavior problems. *European Early Childhood Education Research Journal*, *26*(5), 701-717.

Malecki, C. K., & Demaray, M. K. (2002). Measuring perceived social support: Development of the child and adolescent social support scale (CASSS). *Psychology in the Schools, 39*(1). https://doi.org/https://doi.org/10.1002/pits.10004

McClelland, M. M., Cameron, C. E., Wanless, S. B., Murray, A., Saracho, O., & Spodek, B. (2007). Executive function, behavioral self-regulation, and social-emotional competence. *Contemporary perspectives on social learning in early childhood education, 1*, 113-137.

McDermott, P. A. (1999). National scales of differential learning behaviors among American children and adolescents. *School Psychology Review, 28*(2), 280-291.

McInerney, R. J., Hrabok, M., & Kerns, K. A. (2005). The children’s size-ordering task: a new measure of nonverbal working memory. *Journal of Clinical and Experimental Neuropsychology, 27*(6), 735-745.

McKinney, J. D., & Feagans, L. (1983). Adaptive classroom behavior of learning disabled students. *Journal of Learning Disabilities, 16*(6), 360-367.

*McKown, C., Russo-Ponsaran, N. M., Johnson, J. K., Russo, J., & Allen, A. (2016). Web-Based Assessment of Children's Social-Emotional Comprehension. *Journal of Psychoeducational Assessment, 34*(4), 322-338. https://doi.org/http://dx.doi.org/10.1177/0734282915604564

*Meixner, J. M., Warner, G. J., Lensing, N., Schiefele, U., & Elsner, B. (2019). The relation between executive functions and reading comprehension in primary-school students: A cross-lagged-panel analysis. *Early Childhood Research Quarterly*, *46*, 62-74. https://doi.org/10.1016/j.ecresq.2018.04.010

Merrell, K. W. (1995). An investigation of the relationship between social skills and internalizing problems in early childhood: Construct validity of the Preschool and Kindergarten Behavior Scales. *Journal of Psychoeducational Assessment, 13*(3), 230-240. https://doi.org/https://doi.org/10.1177/073428299501300302

Merrell, K. W. (2002). *PKBS-2. Preschool and Kindergarten Behavior Scales*. PRO· ED.

Merrell, K. W., Cohn, B. P., & Tom, K. M. (2011). Development and validation of a teacher report measure for assessing social-emotional strengths of children and adolescents. *School Psychology Review, 40*(2), 226-241.

Mirabile, S. (2008). The child emotion regulation questionnaire: Procedures and scoring. *Available from the author. University of New Orleans*.

Murray, K. T., & Kochanska, G. (2002). Effortful control: Factor structure and relation to externalizing and internalizing behaviors. *Journal of abnormal child psychology, 30*(5), 503-514.

Naglieri, J., LeBuffe, P. A., & Shapiro, D. (2011/2014). *The Devereux Student Strengths Assessment –Mini (DESSA-Mini): Assessment, technical manual, and user’s guide*. Apperson, Inc.

Novak, S. P., & Clayton, R. R. (2001). The influence of school environment and self-regulation on transitions between stages of cigarette smoking: A multilevel analysis. *Health Psychology, 20*(3), 196. https://doi.org/https://doi.org/10.1037/0278-6133.20.3.196

*O'Brennan, L. M., Waasdorp, T. E., Pas, E. T., & Bradshaw, C. P. (2015). Peer victimization and social-emotional functioning: A longitudinal comparison of students in general and special education. *Remedial and Special Education*, *36*(5), 275-285. https://doi.org/http://dx.doi.org/10.1177/0741932515575615

*Ogurlu, Ü., Sevgi-Yalın, H., & Yavuz-Birben, F. (2018). The relationship between social–emotional learning ability and perceived social support in gifted students. *Gifted* *Education International, 34*(1), 76-95.

*O'Meagher, S., Kemp, N., Norris, K., Anderson, P., & Skilbeck, C. (2017). Risk factors for executive function difficulties in preschool and early school-age preterm children. *Acta Paediatrica*, *106*(9), 1468-1473. https://doi.org/https://dx.doi.org/10.1111/apa.13915

Osborn, A., Butler, N., & Morris, A. (1984). The Social Life of Britain's Five Year-olds (Henley, Routledge & Kegan Paul). *OsbornThe Social Life of Britain's Five Year Olds1984*.

*Ozyurt, G., Ozturk, Y., & Akay, A. (2017). Relation of emotion regulation and empathy skills with maternal emotion regulation and attachment in children diagnosed with ADHD [DEHB'li olgularda empati ve duygu duzenleme becerilerinin annelerinin baglanma ve duygu duzenleme becerileri ile iliskisi.]. *Anadolu Psikiyatri Dergisi*, *18*(6), 611-620.

*Papaioannou, S., Mouzaki, A., Sideridis, G. D., Antoniou, F., Padeliadu, S., & Simos, P. G. (2016). Cognitive and academic abilities associated with symptoms of attention-deficit/hyperactivity disorder: a comparison between subtypes in a Greek non-clinical sample. *Educational Psychology*, *36*(1), 138-158.

Parker, J. G., & Asher, S. R. (1993). Friendship and friendship quality in middle childhood: Links with peer group acceptance and feelings of loneliness and social dissatisfaction. *Developmental psychology, 29*(4), 611.

Patton, J. H., Stanford, M. S., & Barratt, E. S. (1995). Factor structure of the Barratt impulsiveness scale. *Journal of clinical psychology, 51*(6), 768-774.

*Pelletier, J., & Fesseha, E. (2019). The impact of full-day kindergarten on learning outcomes and self-regulation among kindergarten children at risk for placement in special education. *Exceptionality Education International*, *29*(3), 42-56.

Petermann, F., & Petermann, U. (2007). Hamburg-Wechsler-Intelligenztest für Kinder IV (HAWIK-IV). *Bern: Huber*.

Peterson, J. L., & Zill, N. (1986). Marital disruption, parent-child relationships, and behavior problems in children. *Journal of Marriage and the Family*, 295-307.

*Piche, G., Fitzpatrick, C., & Pagani, L. S. (2015). Associations between extracurricular activity and self-regulation: A longitudinal study from 5 to 10 years of age. *American Journal of Health Promotion*, *30*(1), e32-40.

Pickering, S. J., & Gathercole, S. E. (2001). The Working Memory Test Battery for Children.

Ponitz, C. C., McClelland, M. M., Matthews, J. S., & Morrison, F. J. (2009). A structured observation of behavioral self-regulation and its contribution to kindergarten outcomes. *Developmental psychology, 45*(3), 605.

Ponitz, C. E. C., McClelland, M. M., Jewkes, A. M., Connor, C. M., Farris, C. L., & Morrison, F. J. (2008). Touch your toes! Developing a direct measure of behavioral regulation in early childhood. *Early Childhood Research Quarterly, 23*(2), 141-158.

Quirk, M., Rebelez, J., & Furlong, M. (2014). Exploring the dimensionality of a brief school readiness screener for use with Latino/a children. *Journal of Psychoeducational Assessment, 32*(3), 259-264.

Rauch, W. A., Gawrilow, C., Schermelleh-Engel, K., & Schmitt, K. (2014). Dispositionelle Selbstkontrollkapazität bei Kindern. *Diagnostica*.

Reed, M. A., Pien, D. L., & Rothbart, M. K. (1984). Inhibitory self-control in preschool children. *Merrill-Palmer Quarterly (1982-)*, 131-147.

Reitan, R. (1971). Trail making test results for normal and braindamaged children. . *Percept Mot Skills., 33*(2), 575-581. https://doi.org/10.2466/pms. 1971.33.2.575

Rimm-Kaufman, S. (2005). Survey of early school adjustment. *Unpublished manuscript, University of Virginia, Charlottesville, VA*.

Roebers, C. M., Röthlisberger, M., Cimeli, P., Michel, E., & Neuenschwander, R. (2011). School enrolment and executive functioning: A longitudinal perspective on developmental changes, the influence of learning context, and the prediction of pre-academic skills. *European Journal of Developmental Psychology, 8*(5), 526-540.

Rohner, R. P., Khaleque, A., & Cournoyer, D. (2005). Parental Acceptance-Rejection Theory, Methods, Evidence, and Implications. *Ethos: Journal of the Society for Psychological Anthropology, 33*(3).

Romero Martínez, S. J., Ordóñez Camacho, X. G., & Gil Madrona, P. (2018). Development of the Checklist of Psychomotor Activities for 5- to 6-Year-Old Children. *Perceptual and Motor Skills, 125*(6), 1070-1092. https://doi.org/10.1177/0031512518804359

Rosvold, H. E., Mirsky, A. F., Sarason, I., Bransome Jr, E. D., & Beck, L. H. (1956). A continuous performance test of brain damage. *Journal of consulting psychology, 20*(5), 343.

Rothbart, M. K., Ahadi, S. A., Hershey, K. L., & Fisher, P. (2001). Investigations of temperament at three to seven years: The Children's Behavior Questionnaire. *Child development, 72*(5), 1394-1408.

Rubin, K. H. (1988). *The social problem-solving test-revised. Unpublished manuscript*. University of Waterloo.

Rubin, K. H., & Krasnor, L. (1986). Social-cognitive and social behavioral perspectives on problem-solving. In M. Perlmutter (Ed.), *Cognitive Perspectives on Children’s Social and Behavioral Development: The Minnesota Symposia on Child Psychology* (pp. 1-68). Lawrence Erlbaum.

Rueda, M. R., Fan, J., McCandliss, B. D., Halparin, J. D., Gruber, D. B., Lercari, L. P., & Posner, M. I. (2004). Development of attentional networks in childhood. *Neuropsychologia, 42*(8), 1029-1040.

Ryan, R. M. (1982). Control and information in the intrapersonal sphere: An extension of cognitive evaluation theory. *Journal of personality and social psychology, 43*(3), 450.

Ryan, R. M., & Connell, J. P. (1989). Perceived locus of causality and internalization: examining reasons for acting in two domains. *Journal of personality and social psychology, 57*(5), 749.

Salles, J. F. d., Fonseca, R. P., Cruz-Rodrigues, C., Mello, C. B., Barbosa, T., & Miranda, M. C. (2011). Desenvolvimento do instrumento de avaliação neuropsicológica breve infantil NEUPSILIN-INF. *Psico-USF, 16*, 297-305.

*Sang, B., Ding, X., Coplan, R. J., Liu, J., Pan, T., & Feng, X. (2018). Assessment and implications of social avoidance in Chinese early adolescents. *The Journal of Early Adolescence*, *38*(4), 554-573.

*Sasser, T. R., Bierman, K. L., & Heinrichs, B. (2015). Executive functioning and school adjustment: The mediational role of pre-kindergarten learning-related behaviors. *Early Childhood Research Quarterly*, *30*(Part A), 70-79. https://doi.org/10.1016/j.ecresq.2014.09.001

*Schmitt, S. A., Geldhof, G. J., Purpura, D. J., Duncan, R., & McClelland, M. M. (2017). Examining the relations between executive function, math, and literacy during the transition to kindergarten: A multi-analytic approach. *Journal of Educational Psychology*, *109*(8), 1120-1140. https://doi.org/http://dx.doi.org/10.1037/edu0000193

*Scrimin, S., Osler, G., Moscardino, U., & Mason, L. (2018). Classroom climate, cardiac vagal tone, and inhibitory control: links to focused attention in first graders. *Mind, Brain & Education*, *12*(1), 61-70. https://doi.org/10.1111/mbe.12169

*See, B. H., & Ibbotson, L. (2018). A feasibility study of the impact of the Kodály-inspired music programme on the developmental outcomes of four to five year olds in England. *International Journal of Educational Research*, *89*, 10-21.

Shallice, T. (1982). Specific impairments of planning. *Philos Trans R Soc Lond B Biol Sci, 298*(1089), 199-209. https://doi.org/doi: 10.1098/rstb. 1982.0082

*Shapiro, V. B., Kim, B. K., Robitaille, J. L., & LeBuffe, P. A. (2017). Protective factor screening for prevention practice: Sensitivity and specificity of the DESSA-Mini. *School psychology quarterly*, *32*(4), 449.

Shields, A., & Cicchetti, D. (1997). Emotion regulation among school-age children: the development and validation of a new criterion Q-sort scale. *Developmental psychology, 33*(6), 906.

Simos, P., Mouzaki, A., & Sideridis, G. (2007). *Test of attention for elementary school students*. Greek Ministry of Education.

Skinner, E. A., Kindermann, T. A., & Furrer, C. J. (2009). A motivational perspective on engagement and disaffection: Conceptualization and assessment of children's behavioral and emotional participation in academic activities in the classroom. *Educational and psychological measurement, 69*(3), 493-525.

*Sloan, S., Winter, K., Connolly, P., & Gildea, A. (2020). The effectiveness of Nurture Groups in improving outcomes for young children with social, emotional and behavioural difficulties in primary schools: An evaluation of Nurture Group provision in Northern Ireland. *Children & Youth Services Review, 108*, N.PAG-N.PAG. https://doi.org/10.1016/j.childyouth.2019.104619

Smith-Donald, R., Raver, C. C., Hayes, T., & Richardson, B. (2007). Preliminary construct and concurrent validity of the Preschool Self-regulation Assessment (PSRA) for field-based research. *Early Childhood Research Quarterly, 22*(2), 173-187.

*Stormont, M., Cohen, D. R., Herman, K. C., & Reinke, W. M. (2019). Teacher-rated school readiness items in a kindergarten sample: Outcomes in first grade. *School Psychology*, *34*(6), 612-621. https://doi.org/http://dx.doi.org/10.1037/spq0000329

Stormont, M., Reinke, W., & Herman, K. (2011). *The kindergarten academic behavior readiness screener (K-ABR)*. University of Missouri.

Strommen, E. A. (1973). Verbal self-regulation in a children's game: impulsive errors on" Simon Says". *Child development*, 849-853.

Swanson, J. M., Schuck, S., Porter, M. M., Carlson, C., Hartman, C. A., Sergeant, J. A., Clevenger, W., Wasdell, M., McCleary, R., & Lakes, K. (2012). Categorical and dimensional definitions and evaluations of symptoms of ADHD: history of the SNAP and the SWAN rating scales. *The International journal of educational and psychological assessment, 10*(1), 51.

Sylva, K., Melhuish, E., Sammons, P., Siraj-Blatchford, I., & Taggart, B. (2008). *Final Report from the Primary Phase: Pre-school, school and family influences on children’s development during key stage 2* (Age 7-11). London, DCSF.

*Talaee, E. (2019). Longitudinal impacts of home computer use in early years on children's social and behavioral development. *International Electronic Journal of Elementary Education*, *11*(3), 233-245. https://doi.org/10.26822/iejee.2019349248

*Tasoren, A. (2016). The relationship between perceived parental acceptance-rejection, personality and behavioral dispositions, and executive function in a turkish primary school sample. *Journal of Psychological and Educational Research*, *24*(1), 61-83.

Tremblay RE, Loeber R, Gagnon C, et al. (1991). Disruptive boys with stable and unstable high fighting behavior patterns during

junior elementary school. *Journal of Abnormal Child Psychology 19*, 285–300.

U.S. Department of Education, N. C. f. E. S. (2002). *Early Childhood Longitudinal Study—Kindergarten Class of 1998–99 (ECLS–K), Psychometric Report for Kindergarten Through First Grade*. I. o. E. S. U.S. Department of Education, NCES.

UK Government Department for Education. (2014). *Early years foundation stage profile: Exemplification materials*. https://www.gov.uk/government/publications/eyfs-profile-exemplication-materials

*van der Niet, A. G., Smith, J., Oosterlaan, J., Scherder, E. J., Hartman, E., & Visscher, C. (2016). Effects of a cognitively demanding aerobic intervention during recess on children's physical fitness and executive functioning. *Pediatric Exercise Science*, *28*(1), 64-70. https://doi.org/https://dx.doi.org/10.1123/pes.2015-0084

Vandevelde, S., Van Keer, H., & Rosseel, Y. (2013, 2013/10/01/). Measuring the complexity of upper primary school children’s self-regulated learning: A multi-component approach. *Contemporary Educational Psychology, 38*(4), 407-425. https://doi.org/https://doi.org/10.1016/j.cedpsych.2013.09.002

*Vandevelde, S., Van Keer, H., Schellings, G., & Van Hout-Wolters, B. (2015). Using think-aloud protocol analysis to gain in-depth insights into upper primary school children's self-regulated learning. *Learning & Individual Differences*, *43*, 11-30. https://doi.org/10.1016/j.lindif.2015.08.027

Volpe, R. J., McConaughy, S. H., & Hintze, J. M. (2009). Generalizability of classroom behavior problem and on-task scores from the Direct Observation Form. *School Psychology Review, 38*(3), 382-401.

*Wagner, B., Olson, H. C., Symons, M., Mazzucchelli, T. G., Jirikowic, T., Latimer, J., Watkins, R., Cross, D., Boulton, J., Wright, E., Carter, M., Bruce, K., Cherel, S., & Fitzpatrick, J. (2019). Improving self-regulation and executive functioning skills in primary school children in a remote Australian Aboriginal community: A pilot study of the Alert Program®. *Australian Journal of Education*, *63*(1), 98-115. https://search.informit.com.au/fullText;res=AEIPT;dn=223128

*Wang, A. H., & Fitzpatrick, C. (2019). Which early childhood experiences and skills predict kindergarten working memory? *Journal of Developmental & Behavioral Pediatrics*, *40*(1), 40-48. https://doi.org/https://dx.doi.org/10.1097/DBP.0000000000000610

Waters, E. (1995). The attachment Q-set. *Caregiving, cultural, and cognitive perspectives on secure-base behavior and working models. Monographs of the Society for Research in Child Development, 60*(2-3), 247-254.

Wechsler, D. (1987). Manual for the Wechsler memory scale-revised. *San Antonio, TX: Psychological Corporation*.

Wechsler, D. (1991). *Manual for the Wechsler Intelligence Scale for children – Third Edition (WISC-III)*. The Psychological Corporation.

Wechsler, D. (2002). *Wechsler preschool and primary scale of intelligence* (3rd ed.). The Psychological Corporation.

Wechsler, D. (2012). Wechsler preschool and primary scale of intelligence—fourth edition. *The Psychological Corporation San Antonio, TX*.

Wechsler, D., & Kodama, H. (1949). *Wechsler intelligence scale for children*. Psychological corporation New York.

Weiss, B., Harris, V., Catron, T., & Han, S. S. (2003). Efficacy of the RECAP intervention program for children with concurrent internalizing and externalizing problems. *Journal of Consulting and Clinical Psychology, 71*(2), 364.

Wellborn, J. G. (1992). *Engaged and disaffected action: The conceptualization and measurement of motivation in the academic domain*. University of Rochester.

Wellman, H. M., & Liu, D. (2004). Scaling of theory‐of‐mind tasks. *Child development, 75*(2), 523-541. https://doi.org/https://doi.org/10.1111/j.1467-8624.2004.00691.x

Werthamer-Larsson, L., Kellam, S., & Wheeler, L. (1991). Effect of first‐grade classroom environment on shy behavior, aggressive behavior, and concentration problems. *American Journal of Community Psychology, 19*(4), 585-602. https://doi.org/https://doi.org/10.1007/BF00937993

Willoughby, M. T., Blair, C. B., Wirth, R., & Greenberg, M. (2012). The measurement of executive function at age 5: psychometric properties and relationship to academic achievement. *Psychological assessment, 24*(1), 226.

*Wolfe, K. R., Vannatta, K., Nelin, M. A., & Yeates, K. O. (2015). Executive functions, social information processing, and social adjustment in young children born with very low birth weight. *Child Neuropsychology*, *21*(1), 41-54. https://doi.org/http://dx.doi.org/10.1080/09297049.2013.866217

Woodcock, R. W., McGrew, K., & Mather, N. (2007). *Woodcock-Johnson III Tests of Achievement*. Riverside Publishing.

Yardımcı, F., & Başbakkal, Z. (2009). Validty and reliability studies of child-adolescent social support scale in Turkey. *Journal of Anatolia Nursing and Health Sciences, 12*(2). https://doi.org/https://dergipark.org.tr/en/pub/ataunihem/issue/2645/34026

Zelazo, P. D. (2006). The Dimensional Change Card Sort (DCCS): A method of assessing executive function in children. *Nature protocols, 1*(1), 297-301.

Zimmermann, P., Gondan, M., & Fimm, B. (2005). *Test of Attentional Performance for Children (KITAP)*. Psytest.
